# Supplementary material for: Efficient S-band electromagnetic wave absorption in hierarchically hollow CoFe 2 O 4 /C nanocomposites modified with ZIF-67 derivatives
Source: Royal Society of Chemistry journal article supplement (doi:10.1039/d4ta08139k), 2025-01-01
Supplement: d4ta08139k1.pdf [file d4ta08139k1.pdf]

## Supporting Information

# Efficient S-band Electromagnetic Wave Absorption in Hierarchically Hollow CoFe<sub>2</sub>O<sub>4</sub>/C Nanocomposites Modified by ZIF-67 Derivatives

Ze Cai<sup>1‡</sup>, Peishuo Sun<sup>1‡</sup>, Lutfia Isna Ardhayanti<sup>1</sup>, Md. Saidul Islam<sup>1\*</sup>, Tatsuki Tsugawa,<sup>2</sup> Keita Kuroiwa<sup>3</sup>, Yoshihiro Sekine<sup>1,4</sup>, Shintaro Ida,<sup>2,5</sup> Shinya Hayami<sup>1,5,6\*</sup>

1. Department of Chemistry, Graduate School of Science and Technology, Kumamoto University, 2-39-1 Kurokami, Chuo-ku, Kumamoto 860-8555, Japan.

2. Faculty of Engineering, Graduate School of Science and Technology, Kumamoto University, 2-39-1 Kurokami, Chuo-ku, Kumamoto 860-8555, Japan.

3. Department of Nanoscience, Faculty of Engineering, Sojo University, 4-22-1 Ikeda, Nishi-ku, Kumamoto 860-0082, Japan.

4. Priority Organization for Innovation and Excellence, Kumamoto University, 2-39-1 Kurokami, Chuo-ku, Kumamoto 860-8555, Japan.

5. Institute of Industrial Nanomaterials (IINa), Kumamoto University, 2-39-1 Kurokami, Chuo-ku, Kumamoto 860-8555, Japan.

6. International Research Center for Agricultural and Environmental Biology (IRCAEB), 2-39-1 Kurokami, Chuo-ku, Kumamoto 860-8555, Japan.

‡ Authors Contribute equally

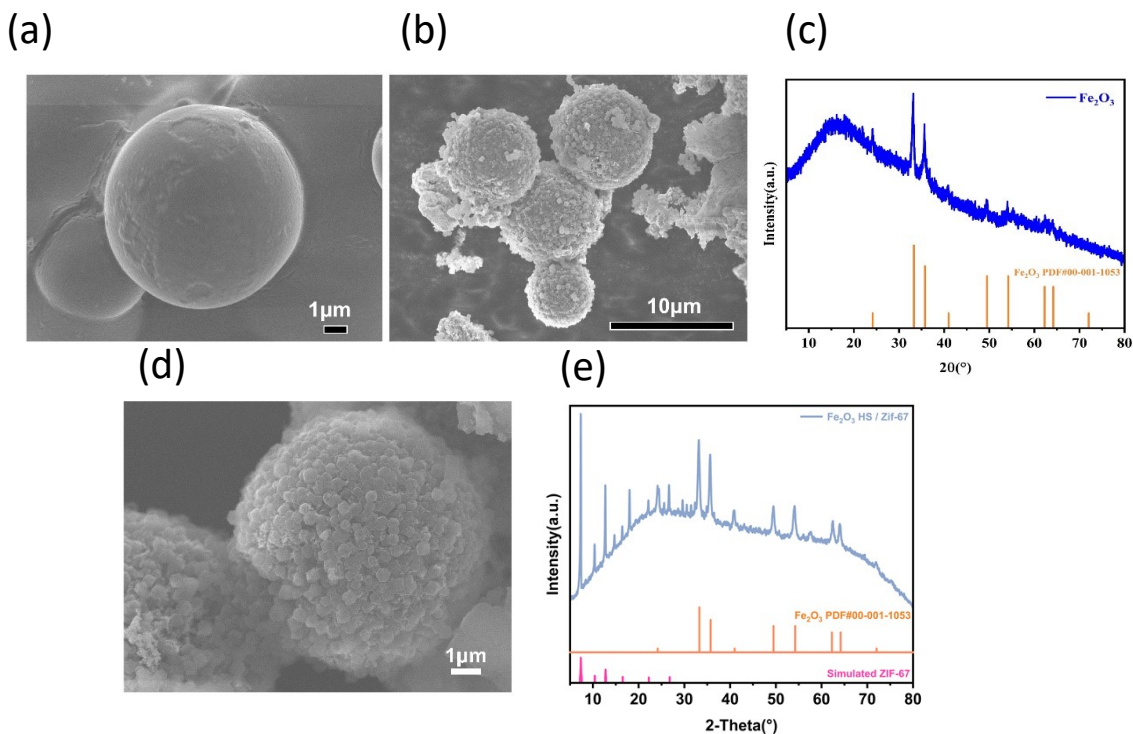

**Figure S1.** (a) SEM images of carbon sphere, (b) SEM images of  $\text{Fe}_2\text{O}_3$  hollow sphere, (c) PXRD of  $\text{Fe}_2\text{O}_3$  sphere, (d) SEM images of ZIF-67/ $\text{Fe}_2\text{O}_3$ , (e) PXRD of ZIF-67/ $\text{Fe}_2\text{O}_3$ .

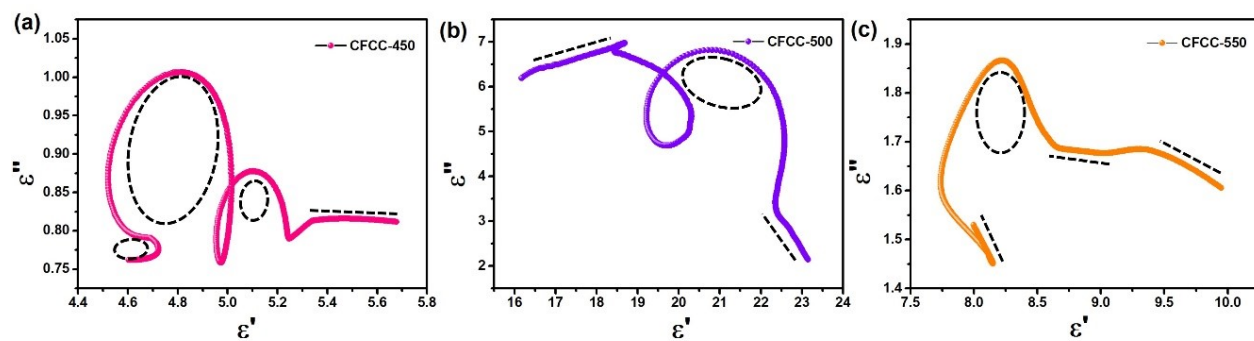

**Figure S2.** The Cole-Cole curves of (a) CFCC-450; (b) CFCC-500; (c) CFCC-550

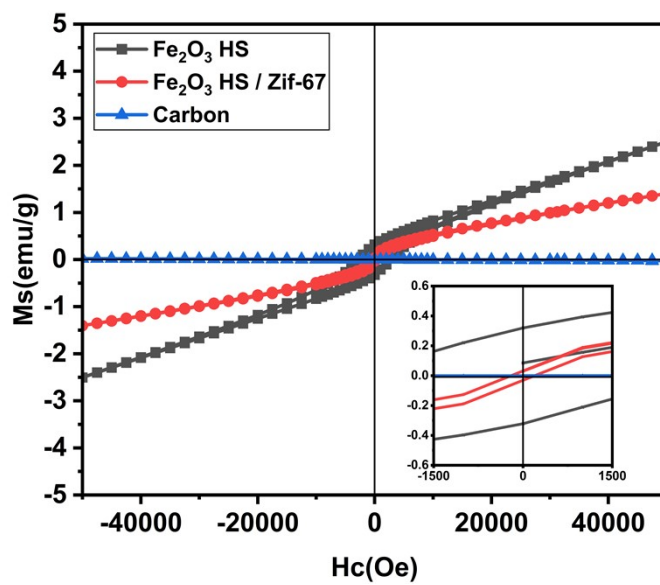

**Figure S3:** The magnetic hysteresis loops of carbon spheres,  $Fe_2O_3$  and ZIF-67/ $Fe_2O_3$  precursor.
